# Supplementary material
Source: PubMed Central journal article supplement (PMC9007863)
Supplement: NIHMS1779401-supplement-1.pdf [file NIHMS1779401-supplement-1.pdf]

| <b>Sub Class</b> | <b>Common Name</b>            | <b>Synonyms</b> | <b>Molecular Formula</b> | <b>Yumm 5.2</b> | <b>B16F10</b> | <b>A375</b> |
|------------------|-------------------------------|-----------------|--------------------------|-----------------|---------------|-------------|
| Short-chain      | Formic acid                   | C1:0            | C1H2O1                   | 1mM             | 1mM           | 1mM         |
|                  | Acetic acid                   | C2:0            | C2H4O2                   | 1mM             | 1mM           | 1mM         |
|                  | Propionic acid                | C3:0            | C3H6O2                   | 1mM             | 1mM           | 1mM         |
|                  | Butyric acid                  | C4:0            | C4H8O2                   | 1mM             | 1mM           | 1mM         |
|                  | Isobutyric acid               | C4:0            | C4H8O2                   | 1mM             | 1mM           | 1mM         |
|                  | Valeric acid                  | C5:0            | C5H10O2                  | 1mM             | 1mM           | 1mM         |
| Medium-chain     | Caproic acid (Hexanoic acid)  | C6:0            | C6H12O2                  | 100μM           | 100μM         | 100μM       |
|                  | Caprylic acid (Octanoic acid) | C8:0            | C8H16O2                  | 100μM           | 100μM         | 100μM       |
|                  | Capric acid (Decanoic acid)   | C10:0           | C10H20O2                 | 100μM           | 100μM         | 100μM       |
|                  | Lauric acid                   | C12:0           | C12H24O2                 | 40μM            | 100μM         | 100μM       |
| Long-chain       | Myristic acid                 | C14:0           | C14H28O2                 | 20μM            | 20μM          | 20μM        |
|                  | Palmitic acid (PA)            | C16:0           | C16H32O2                 | 20μM            | 20μM          | 20μM        |
|                  | Stearic acid (SA)             | C18:0           | C18H36O2                 | 20μM            | 20μM          | 20μM        |
|                  | Arachidic acid                | C20:0           | C20H40O2                 | 10μM            | 20μM          | 20μM        |
|                  | Myristoleic acid              | C14:1           | C14H26O2                 | 40μM            | 40μM          | 40μM        |
|                  | Palmitoleic acid (POA)        | C16:1           | C16H30O2                 | 40μM            | 40μM          | 40μM        |
|                  | Oleic acid (OA)               | C18:1           | C18H34O2                 | 40μM            | 40μM          | 40μM        |
|                  | Linoleic acid (LA)            | C18:2           | C18H32O2                 | 20μM            | 20μM          | 20μM        |
|                  | Linoelaidic acid(γLA)         | C18:2           | C18H32O2                 | 20μM            | 20μM          | 20μM        |
|                  | α-Linolenic acid (αLA)        | C18:3           | C18H30O2                 | 20μM            | 20μM          | 20μM        |
|                  | Arachidonic acid (AA)         | C20:4           | C20H32O2                 | 20μM            | 20μM          | 30μM        |
| Very long-chain  | Eicosapentaenoic acid (EPA)   | C20:5           | C20H30O2                 | 20μM            | 20μM          | 20μM        |
|                  | Behenic acid                  | 22:0            | C22H44O2                 | 20μM            | 20μM          | 20μM        |
|                  | Lignoceric acid               | 24:0            | C24H48O2                 | 10μM            | 10μM          | 10μM        |
|                  | Erucic acid                   | 22:1            | C22H42O2                 | 40μM            | 40μM          | 40μM        |
|                  | Nervonic acid                 | 24:1            | C24H46O2                 | 40μM            | 40μM          | 40μM        |
|                  | Docosahexaenoic acid (DHA)    | 22:6            | C22H32O2                 | 20μM            | 20μM          |             |

Table S1. All types of typical fatty acids that are used in this study, Related to Figure 1. The final concentrations of individual fatty acid applied to each cell lines are listed.

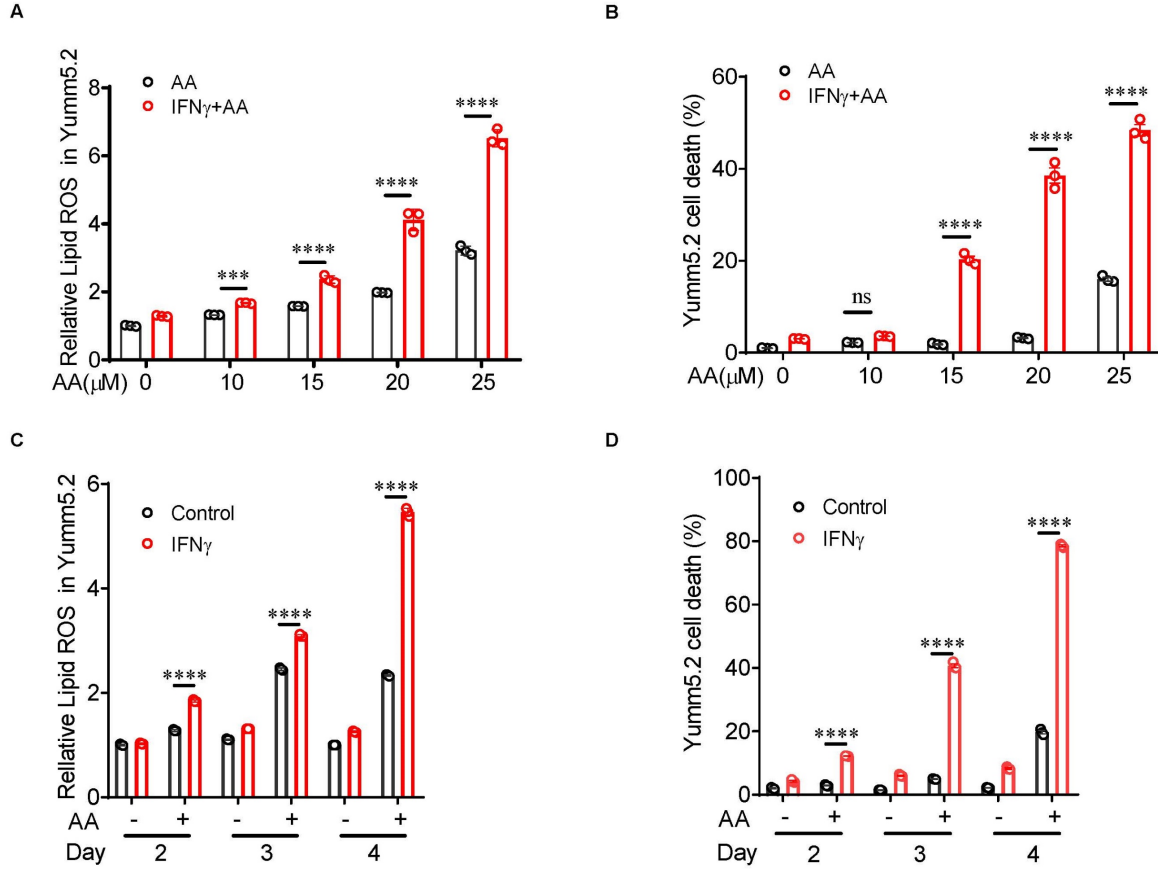

Figure S1. Effect of arachidonic acid and IFN<sub>γ</sub> on tumor cell death, Related to Figure 1.

(A and B) Percentage of relative lipid ROS (A) or dead cells (B) in Yumm5.2 cells treated with IFN<sub>γ</sub> plus different concentrations of arachidonic acid (AA) for 3 days. n = 3 biological replicates. \*\*\**P* = 0.0003 and \*\*\*\**P* < 0.0001 (A); ns, *P* = 0.64 and \*\*\*\**P* < 0.0001 (B) (two-way ANOVA).

(C and D) Percentage of relative lipid ROS (C) or dead cells (D) in Yumm5.2 cells treated with IFN<sub>γ</sub> and AA for 2-4 days. n = 3 biological replicates. (two-way ANOVA). \*\*\*\**P* < 0.0001 (C) and \*\*\*\**P* < 0.0001 (D) (two-way ANOVA).

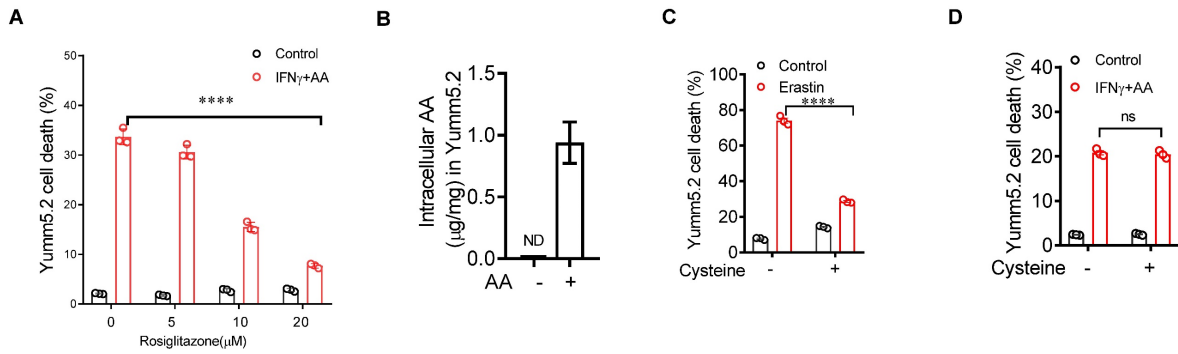

Figure S2. Effect of arachidonic acid and IFN $\gamma$  on tumor ferroptosis, Related to Figure 2.

(A) Percentage of dead cells in Yumm5.2 cells treated with IFN $\gamma$  plus AA for 3 days in the presence of different doses of Rosiglitazone.  $n = 3$  biological replicates. \*\*\*\* $P < 0.0001$  (two-way ANOVA).

(B) AA levels in *Acsl4*<sup>+/+</sup> or *Acsl4*<sup>-/-</sup> Yumm5.2 cells treated AA (20 M) for 2 days. AA was detected by ELISA and normalized by tumor proteins.  $n = 2$  biological replicates, ND, not detected.

(C) Percentage of dead Yumm5.2 cells treated with 2 M Erastin for 24 hours in the presence of 200  $\mu$ M cysteine.  $n = 3$  biological replicates. \*\*\*\* $P < 0.0001$  (two-way ANOVA).

(D) Percentage of dead Yumm5.2 cells treated with IFN $\gamma$  and AA for 3 days in the presence of 200  $\mu$ M cysteine.  $n = 3$  biological replicates. ns,  $P = 0.98$  (two-way ANOVA).

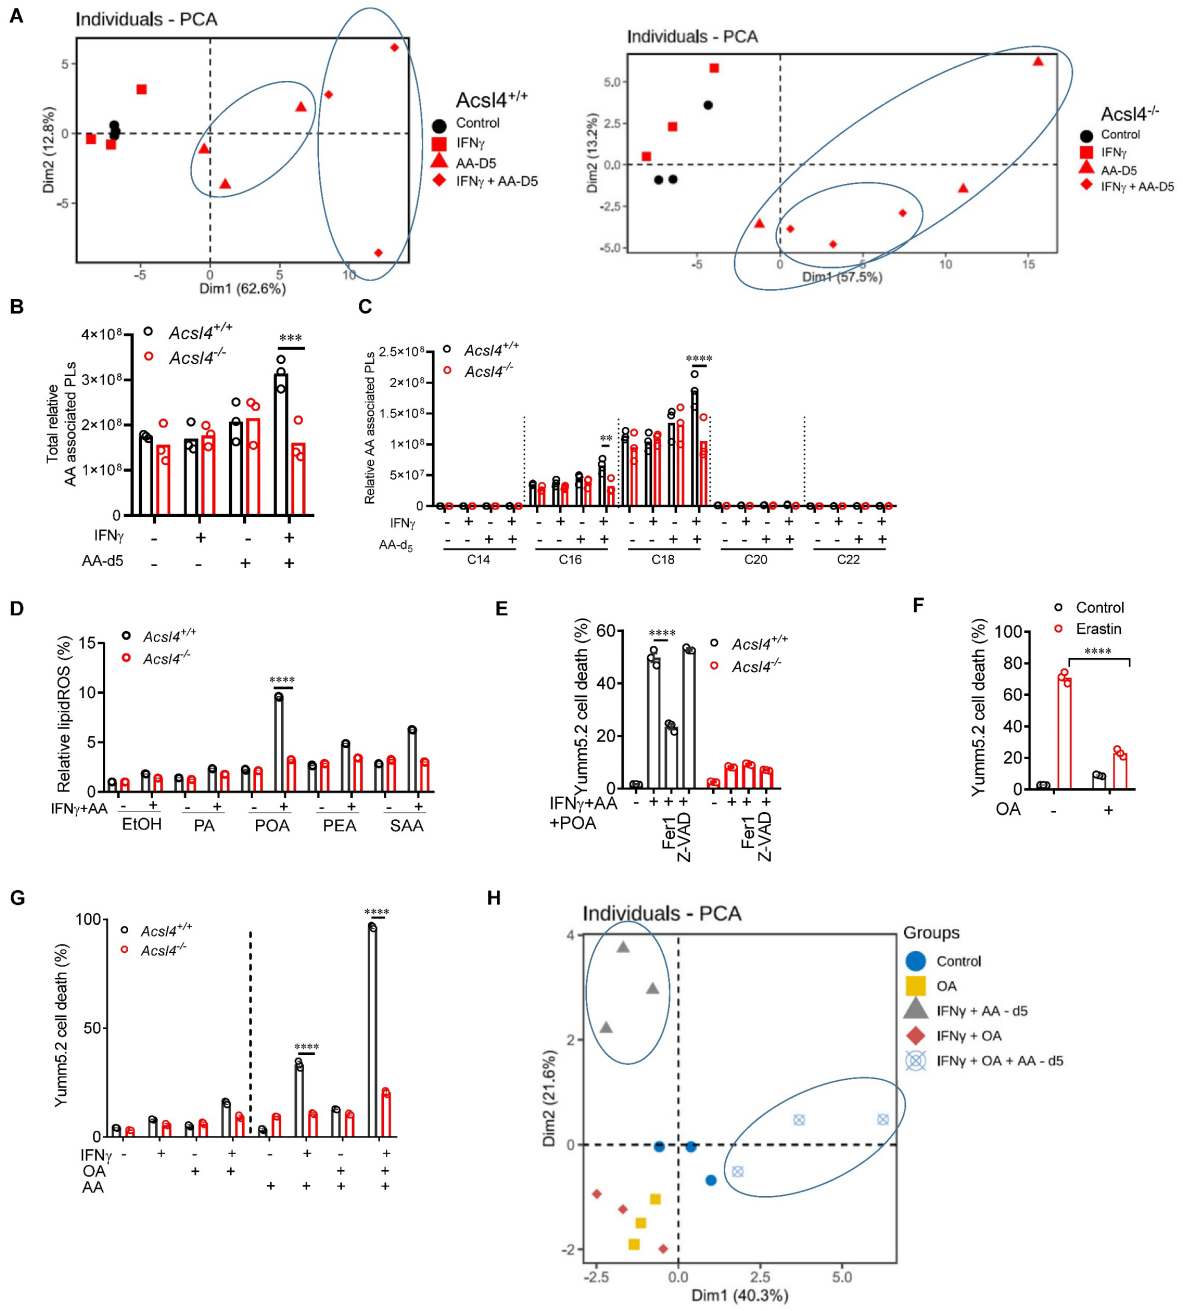

Figure S3. Role of IFN $\gamma$  in ACSL4 associated phospholipids, Related to Figure 4.

- (A) Principal component analysis (PCA) of lipid distribution in *Acs/4<sup>+/+</sup>* and *Acs/4<sup>-/-</sup>* Yumm5.2 cells. Yumm5.2 cells were treated with IFN $\gamma$ , AA-d<sub>5</sub>, and their combination for 48 hours. Lipids were analyzed by ultra-performance liquid chromatography–tandem mass spectrometry.
- (B) Total AA (non-deuterated AA-d<sub>0</sub> and deuterated AA-d<sub>5</sub>) associated phospholipids (PLs) in *Acs/4<sup>+/+</sup>* or *Acs/4<sup>-/-</sup>* Yumm5.2 cells treated with IFN $\gamma$ , AA-d<sub>5</sub>, and their combination for 48 hours. n = 3 biological replicates, mean  $\pm$  s.d. \*\*\**P* = 0.0005 (two-way ANOVA).
- (C) Distribution of different length fatty acids in AA associated PLs in *Acs/4<sup>+/+</sup>* or *Acs/4<sup>-/-</sup>* Yumm5.2 cells treated with IFN $\gamma$ , AA-d<sub>5</sub>, and their combination for 48 hours. n = 3 biological replicates, mean  $\pm$  s.d. \**P* = 0.0407, and \*\*\*\**P* < 0.0001 (two-way ANOVA).
- (D) Relative lipid ROS in *Acs/4<sup>+/+</sup>* or *Acs/4<sup>-/-</sup>* Yumm5.2 cells treated with IFN $\gamma$  and AA (10  $\mu$ M) in the presence of PA (20  $\mu$ M), POA (60  $\mu$ M), PEA (60  $\mu$ M), and SAA (60  $\mu$ M) for 48 hours. n = 3 biological replicates, mean  $\pm$  s.d. \*\*\*\**P* < 0.0001 (two-way ANOVA).
- (E) Percentage of dead cells in *Acs/4<sup>+/+</sup>* or *Acs/4<sup>-/-</sup>* Yumm5.2 cells treated with IFN $\gamma$ , AA (10  $\mu$ M), and POA (40  $\mu$ M) in the presence of ferrostatin-1 (2  $\mu$ M Fer1) or z-VAD-FMK (10  $\mu$ M z-VAD) for 48 hours. n = 3 biological replicates, mean  $\pm$  s.d. \*\*\*\**P* < 0.0001 (two-way ANOVA).
- (F) Percentage of dead Yumm5.2 cells treated with Erastin in the presence of OA (60  $\mu$ M) for 24 hours. n = 3 biological replicates (mean  $\pm$  s.d.). \*\*\*\**P* < 0.0001 (two-way ANOVA).
- (G) Percentage of dead cells in *Acs/4<sup>+/+</sup>* or *Acs/4<sup>-/-</sup>* Yumm5.2 cells treated with IFN $\gamma$ , OA (60  $\mu$ M), AA (20  $\mu$ M), and their combination for 3 days. n = 3 biological replicates, mean  $\pm$  s.d. \*\*\*\**P* < 0.0001 (two-way ANOVA).
- (H) Principal component analysis (PCA) of lipid distribution in Yumm5.2 cells treated with IFN $\gamma$ , OA and AA-d<sub>5</sub>. Cells were treated with IFN $\gamma$  (10 ng/ml), OA (60  $\mu$ M), AA-d<sub>5</sub> (10  $\mu$ M) or their combinations for 48 hours. Whole cell phospholipids were analyzed by ultra-performance liquid chromatography–tandem mass spectrometry. n = 3 replicates.

| Sub Class  | Common Name         | Abbreviation | Synonyms  | Systematic Name       | Molecular Formula | Exact Mass |
|------------|---------------------|--------------|-----------|-----------------------|-------------------|------------|
| Saturate   | Palmitic Acid       | PA           | C16:0     | hexadecanoic acid     | C16H32O2          | 256.2      |
|            | Stearic Acid        | SA           | C18:0     | octadecanoic acid     | C18H36O2          | 284.3      |
| Unsaturate | Palmitoleic acid    | POA          | C16:1n-7  | 9Z-hexadecenoic acid  | C16H30O2          | 254.2      |
|            | Palmitelaidic acid  | PEA          | C16:1n-7  | 9E-hexadecenoic acid  | C16H30O2          | 254.2      |
|            | Sapienic acid       | SAA          | C16:1n-10 | 6Z-hexadecenoic acid  | C16H30O2          | 254.2      |
|            | Oleic acid          | OA           | C18:1n-9  | 9Z-octadecenoic acid  | C18H34O2          | 282.3      |
|            | Elaidic acid        | EA           | C18:1n-9  | 9E-octadecenoic acid  | C18H34O2          | 282.3      |
|            | trans-vaccenic acid | VA           | C18:1n-7  | 11E-octadecenoic acid | C18H34O2          | 282.3      |

Table S2. Isomers of C16:1 and C18:1 fatty acids. Related to Figure 4.

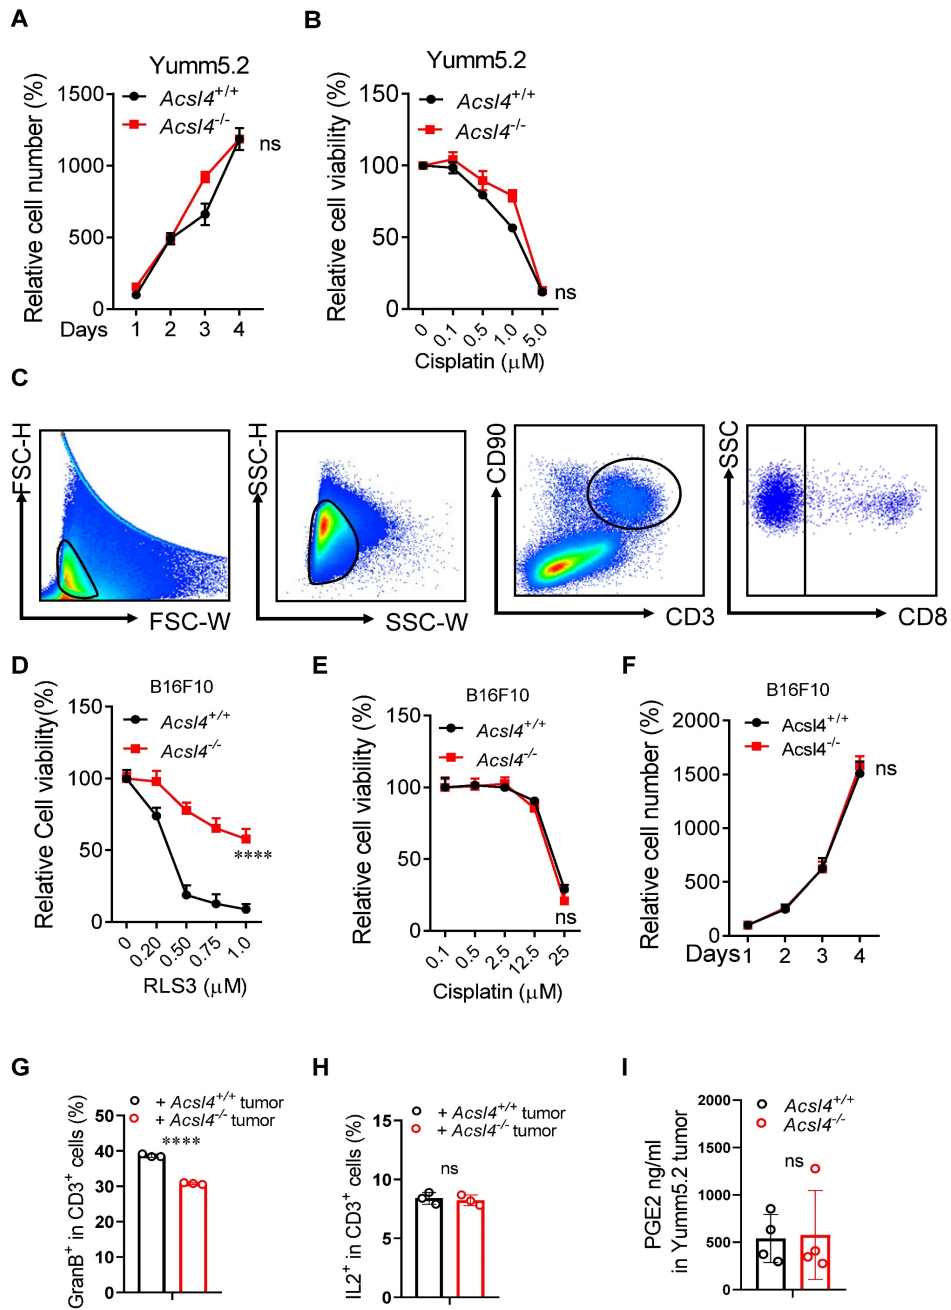

Figure S4. Role of tumor ACSL4 in tumor cells and T cells, Related to Figure 5.

(A) Relative cell numbers of *Acs/4<sup>+/+</sup>* or *Acs/4<sup>-/-</sup>* Yumm5.2 cells. Cell numbers were determined by alamarBlue assay on day 4. n = 4 biological replicates, mean  $\pm$  s.d. ns,  $P > 0.99$  (two-way ANOVA).

(B) *Acs/4<sup>+/+</sup>* or *Acs/4<sup>-/-</sup>* Yumm5.2 cell viability determined by alamarBlue assay. Tumor cells were treated with indicated concentrations of cisplatin for 24 hours. n = 4 biological replicates, mean  $\pm$  s.d. ns,  $P = 0.99$  (two-way ANOVA).

(C) Flow cytometry gating strategy showing T cell identification in the mouse tumor tissues.

(D - F) *Acs/4<sup>+/+</sup>* or *Acs/4<sup>-/-</sup>* B16F10 cells treated with different concentrations of RSL3 (D) or cisplatin (E) for 24 hours or cultured in complete medium for 1-4 days (F). Cell viability (D and E) and relative cell numbers (F) were determined by alamarBlue assay. n = 4 biological replicates. mean  $\pm$  s.d. \*\*\*\* $P < 0.0001$  (D); ns,  $P = 0.48$  (E) and ns,  $P = 0.47$  (F) (two-way ANOVA).

(G and H) Percentages of granzyme B<sup>+</sup> (G) and IL-2<sup>+</sup> (H) in T cells co-cultured with *Acs/4<sup>+/+</sup>* or *Acs/4<sup>-/-</sup>* Yumm5.2 cells. \*\*\*\* $P < 0.0001$  (G); ns,  $P = 0.69$  (H) (two-tailed t-test).

(I) PGE2 levels in *Acs/4<sup>+/+</sup>* or *Acs/4<sup>-/-</sup>* Yumm5.2 tumor tissues in tumor-bearing mice. PGE2 was measured by ELISA. n = 4 biological replicates. ns,  $P = 0.89$  (two-tailed t-test).



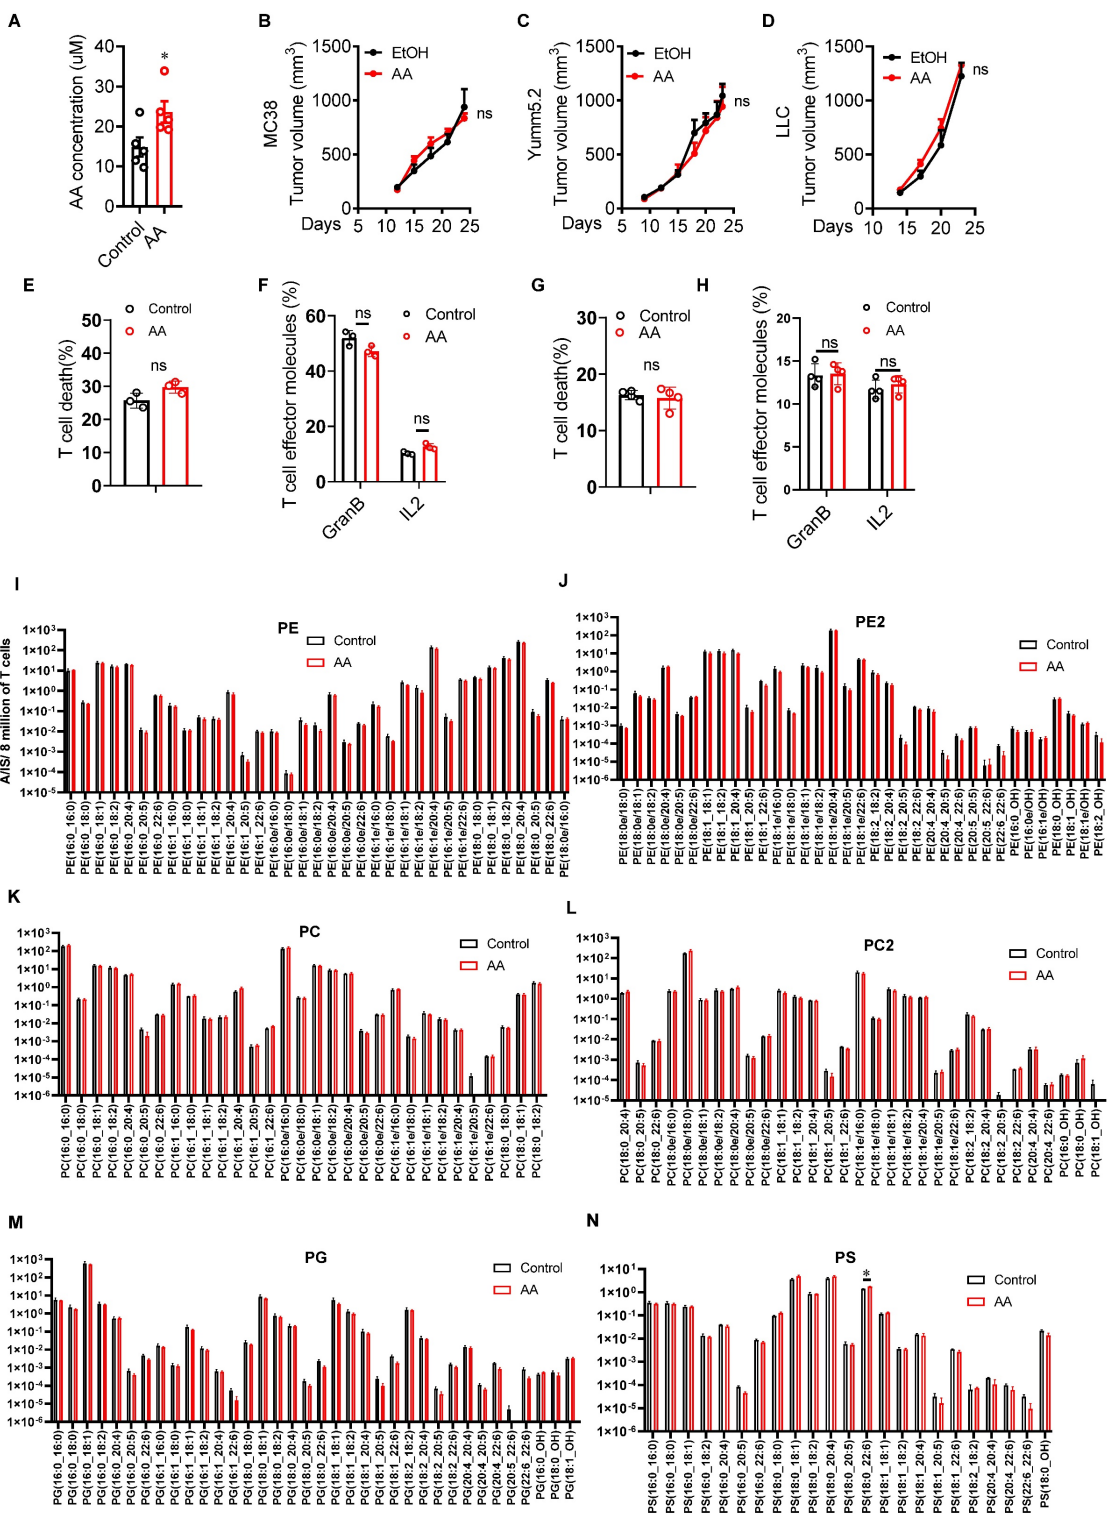

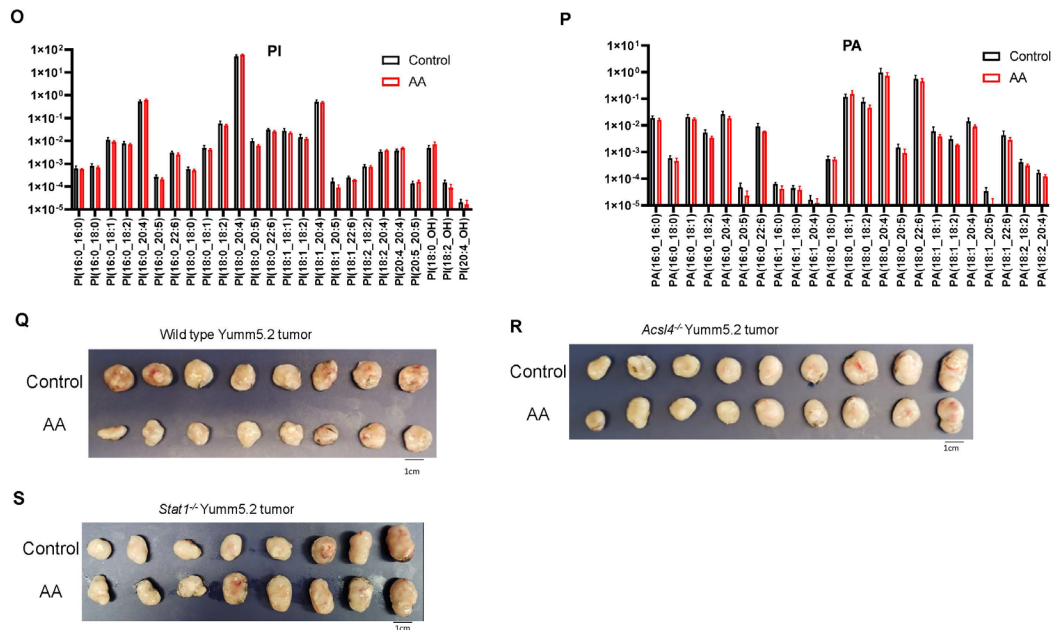

Figure S5. Impact of AA on T cells, Related to Figure 6.

(A) AA concentration in tumor tissue fluids. Yumm5.2 tumor-bearing mice were treated with PBS or AA. AA concentration was detected in tumor tissue fluids post one-day administration. \* $P = 0.0407$  (two-tailed t-test).

(B-D) Effect of AA administration on tumor growth in NSG mice. NSG mice bearing MC38 (B), Yumm5.2 (C), and LLC (D) tumors were treated with PBS and AA. Tumor volume is shown.  $n = 3-5$  mice /group, mean  $\pm$  s.e.m. ns,  $P = 0.85$  (B), ns,  $P = 0.99$  (C) and ns,  $P = 0.88$  (D) (two-way ANOVA).

(E) Percentage of dead T cells. T cells were treated with AA (20  $\mu$ M) for 72 hours *in vitro*.  $n = 3$  biological replicates (mean  $\pm$  s.d.). ns,  $P = 0.07$  (two-tailed t-test).

(F) Percentages of granzyme B<sup>+</sup> and IL-2<sup>+</sup> T cells. T cells were treated with AA (20  $\mu$ M) for 72 hours *in vitro*. ns,  $P = 0.13$  and ns,  $P = 0.06$ ; (Multiple t tests).

(G) Percentage of dead T cells in the tumor microenvironment. Yumm5.2 tumor-bearing mice were treated with AA (2 mg/kg).  $n = 4$  biological replicates (mean  $\pm$  s.d.). ns,  $P = 0.63$  (two-tailed t-test).

(H) Percentages of granzyme B<sup>+</sup> and IL-2<sup>+</sup> T cells in the tumor microenvironment. Yumm5.2 tumor-bearing mice were treated with AA (2 mg/kg). ns,  $P = 0.97$  and ns,  $P = 0.70$  (Multiple t tests).

(I-P) Lipidomics profiling in T cells. Yumm5.2 tumor-bearing mice were treated with AA (2 mg/kg) as indicated. T cells were isolated and sorted for lipidomic profiling. Data are the mean values of the area of analyte (A) over the internal standard (IS) in  $8 \times 10^6$  T cells.  $n = 4$  biological replicates.  $\log_{10}$ -transformation has been applied to visualize and compare the abundance of the different phospholipid species in the samples.  $*P = 0.013$ ; multiple t-test with Sidak–Bonferroni correction for multiple comparisons. Phosphatidylethanolamine (PE) (I and J), phosphatidylcholine (PC) (K and L), phosphatidylglycerol (PG)(M), phosphatidylserine (PS)(N), phosphatidylinositol (PI)(O) and phosphatidic acid (PA)(P).

(Q-S) Effect of AA administration on tumor growth *in vivo*. Wild type (Q), *Acs14<sup>-/-</sup>* (R), and *Stat1<sup>-/-</sup>* (S) Yumm5.2 tumor-bearing mice were treated with PBS and AA. Tumor mass images are shown.  $n = 8-9$  tumors/group.

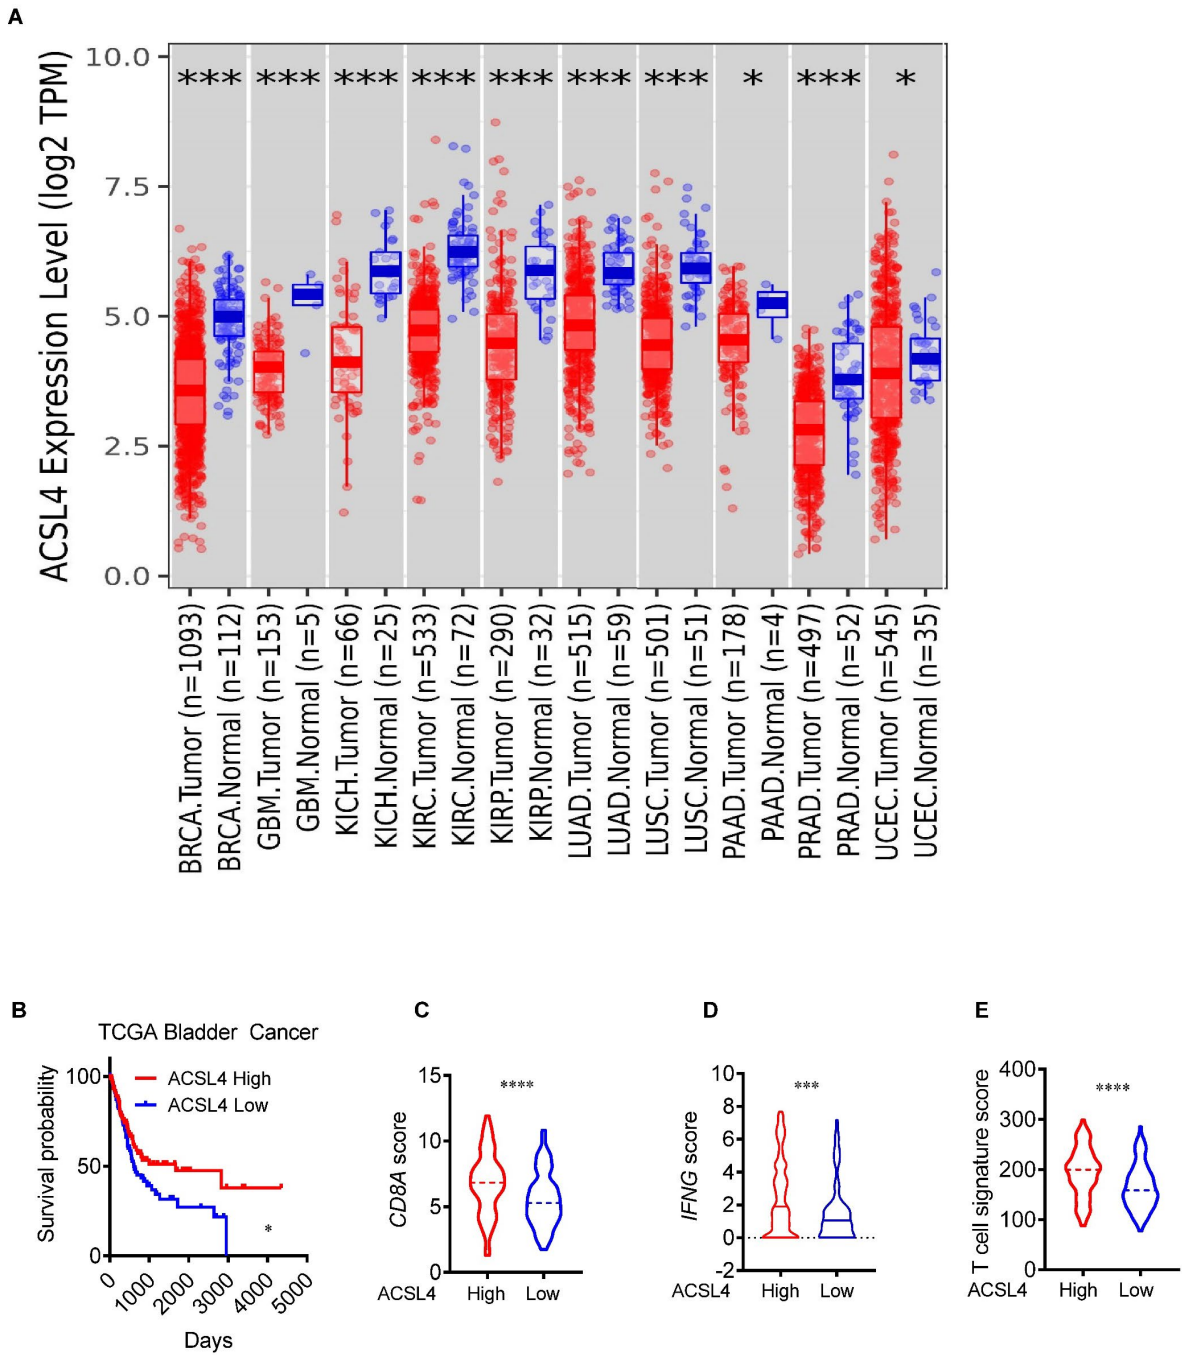

Figure S6. Clinical relevance of human tumor ACSL4, Related to Figure 6.

(A) ACSL4 expression in tumor and adjacent normal tissues in TCGA data sets. BRCA: Breast invasive carcinoma; GBM: Glioblastoma multiforme; KICH: Kidney Chromophobe; KIRC: Kidney renal clear cell carcinoma; KIRP: Kidney renal papillary cell carcinoma; LUAD:

Lung adenocarcinoma; LUSC: Lung squamous cell carcinoma; PAAD: Pancreatic adenocarcinoma; PRAD: Prostate adenocarcinoma; UCEC: Uterine Corpus Endometrial Carcinoma. The statistical significance computed by the Wilcoxon test is annotated by the number of stars ( $*P < 0.05$ ;  $**P < 0.01$ ;  $***P < 0.001$ ).

(B) Kaplan-Meier survival curves for bladder cancer patients with Low (bottom 25%) ( $n = 107$ ) or High (top 25%) ( $n = 107$ ) tumor ACSL4 transcripts in TCGA dataset.  $*P = 0.0489$  (Log-rank test).

(C-E) Correlation between ACSL4 transcripts and immune genes - including CD8A of the minima, median, maxima and range for each blot are (1.28, 6.83, 11.92 and 10.64) (1.75, 5.29, 10.83 and 9.01) (C), IFNG of the minima, median, maxima and range for each blot are (0.0, 1.90, 7.68 and 7.68) (0.0, 1.05, 7.17 and 7.17) (D), and T cell signature score of the minima, median, maxima and range for each blot are (87.6, 199.7, 298.9 and 211.3) (77.5, 158.5, 285.6 and 208.1) (E) in TCGA dataset in patients with bladder cancer expressing High ( $n = 107$ ) or Low ( $n = 107$ ) levels of ACSL4. mean  $\pm$  s.d.  $****P < 0.0001$  (C),  $***P = 0.0009$  (D) and  $****P < 0.0001$ (E) (two-tailed t-test).

| Binding Site (BS) | Primer Sequence                |
|-------------------|--------------------------------|
| hACSL4-BS1        | F:5'-CTCACTGCTGTTAGGCGCA-3'    |
|                   | R:5'-CGATCCGCTTCTGTCAGTCTC-3'  |
| hACSL4-BS2        | F:5'-CAAAGCTGCGGTGACTTTTCC-3'  |
|                   | R:5'-GTAAAGATCCCCGCTCACTCC-3'  |
| hACSL4-BS3        | F:5'-TGTAATCTCAGGTGGTAAGGCA-3' |
|                   | R:5'-TCCCTGATGCGTAATGGTGA-3'   |
| hACSL4-BS4        | F:5'-TCCGGGCGCGTCTTTTC-3'      |
|                   | R:5'-AAGCTCGCAAAAAGGAACCG-3'   |
| hACSL4-BS5        | F:5'-CTCCGGGCGCGTCTTTTC-3'     |
|                   | R:5'-AGCTCGCAAAAAGGAACCG-3'    |

Table S3. ChIP-qPCR primers for specific ACSL4 promotor region amplification, Related to STAR Methods.
